# Supplementary material for: Yeast Nuak1 phosphorylates histone H3 threonine 11 in low glucose stress by the cooperation of AMPK and CK2 signaling
Source: eLife journal article supplement (doi:10.7554/elife.64588), 2020-12-29
Supplement: supp [file elife-64588-supp-v1.zip]

Archive with 10 entries (10 files):
- elife_poa_e64588_Transparent_Reporting_File.pdf
- elife_poa_e64588_Figure_1_figure_supplement_1.pdf
- elife_poa_e64588_Figure_3_figure_supplement_1.pdf
- elife_poa_e64588_Figure_5_figure_supplement_1.pdf
- elife_poa_e64588_Figure_6_figure_supplement_1.pdf
- elife_poa_e64588_Figure_6_figure_supplement_2.pdf
- elife_poa_e64588_Figure_7_figure_supplement_1.pdf
- elife_poa_e64588_Figure_6_source_data_1.xlsx
- elife_poa_e64588_Supplementary_file_1.xlsx
- elife_poa_e64588_Supplementary_file_2.xlsx
