# Supplementary material for: Yeast Nuak1 phosphorylates histone H3 threonine 11 in low glucose stress by the cooperation of AMPK and CK2 signaling
Source: eLife journal article supplement (doi:10.7554/elife.64588), 2020-12-29
Supplement: supp [file elife-64588-supp-v1.zip › elife_poa_e64588_Figure_6_source_data_1.xlsx]

## Sheet: For figure 6-S2AB
	Name	rpkm.wt 1	rpkm.wt 2	rpkm.wt 3		rpkm.wt 1_gly	rpkm.wt 2_gly	rpkm.wt 3_gly		rpkm.t11A1_gly	rpkm.t11A2_gly	rpkm.t11A3_gly
	HSP26	117.376	114.999	116.518		1400.12	1791.42	2129.93		1068.44	1043.85	1145.28
	GRE1	21.8	19.82	16.875		573.795	673.737	916.769		436.017	406.964	484.363
	GND2	17.159	18.387	16.894		162.184	195.79	226.062		97.865	114.242	104.516
	SOL4	52.439	47.105	47.916		237.276	247.59	253.109		154.972	154.603	161.426
	MET13	20.837	25.22	20.006		19.619	17.228	22.42		20.624	21.526	19.084
	PMA1	4037.77	4320.19	4262.86		914.747	861.631	1114.54		980.255	1103.15	968.428
		H3T11A YPgly vs WT Ypgly						WT YPgly vs YPD
		Log2 fold change	Log2 CPM	Pval	Padj			Log2 fold change	Log2 CPM	Pval	Padj
	HSP26	-0.70802	9.39812	2.13129e-06	4.04642e-05		HSP26	3.9308	9.39812	7.27279e-122	1.23672e-120
	GRE1	-0.705327	7.92065	6.00823e-05	0.000634202		GRE1	5.20873	7.92065	8.89889e-132	1.82197e-130
	GND2	-0.88322	7.11674	6.79356e-16	1.27379e-13		GND2	3.47834	7.11674	7.27956e-183	3.16261e-181
	SOL4	-0.647778	6.80442	1.94343e-10	1.5051e-08		SOL4	2.32208	6.80442	1.67744e-103	2.08582e-102
	MET13	0.0467773	5.67853	0.635295	0.8034		MET13	-0.15291	5.67853	0.116359	0.150028
	PMA1	0.0781507	12.8297	0.422549	0.620883		PMA1	-2.1262	12.8297	1.64068e-97	1.86144e-96

## Sheet: For figure6-S2C Ct value
	Ct
	ACT1	HSP26	GRE1	GND2	SOL4	MET13	PMA1
WT-1	16.9457	16.4805	19.111	20.8624	20.8604	23.461	21.2469
WT-2	17.1058	16.6904	19.1334	20.9695	21.0501	23.5437	21.2814
WT-3	16.7112	16.3887	18.6821	20.5909	20.7197	23.3993	21.3141
del-1	16.8966	17.6629	21.5207	22.0305	21.6679	23.3907	20.907
del-2	16.6717	17.6419	21.3953	21.9407	21.5721	23.2656	21.0149
del-3	16.8995	18.1652	21.7557	22.3019	22.0053	23.6645	21.1032
AA-1	16.5622	17.6699	21.0257	21.9095	21.7942	23.4022	20.8734
AA-2	17.1234	18.5191	21.9986	22.7079	22.6668	23.8209	21.185
AA-3	17.0759	18.3211	21.717	22.5537	22.3679	24.1435	21.4474
