# Supplementary material for: Yeast Nuak1 phosphorylates histone H3 threonine 11 in low glucose stress by the cooperation of AMPK and CK2 signaling
Source: eLife journal article supplement (doi:10.7554/elife.64588), 2020-12-29
Supplement: supp [file elife-64588-supp-v1.zip › elife_poa_e64588_Supplementary_file_1.xlsx]

## Sheet: Sheet1
Supplementary file 1. Tda1 C fragment phosphorylation by recombinant Snf1-CAT and Cka1.
		rTda1C only			rTda1C + rSnf1 KD			rTda1C + rCka1
	Residue	Total	Modified	PTM %	Total	Modified	PTM %	Total	Modified	PTM %
Group I	S393	16	0	0	418	31	7.42	7	0	0
	T396	4550	0	0	1449	203	14.0097	4808	0	0
	T397	4550	0	0	1449	69	4.76191	4808	0	0
	T398	4550	0	0	1449	151	10.421	4808	0	0
	Y401	4550	0	0	1449	65	4.48585	4808	0	0
	S408	4550	0	0	1449	68	4.69289	4808	0	0
	S409	4550	0	0	1449	56	3.86473	4808	0	0
	T411	4550	0	0	1449	202	13.9407	4808	0	0
	S412	4550	0	0	1449	105	7.24638	4808	0	0
	T413	4550	0	0	1449	164	11.3182	4808	0	0
	S416	4550	0	0	1449	337	23.2574	4808	0	0
	S417	4550	0	0	1449	297	20.4969	4808	0	0
Group II	S483	433	0	0	520	388	74.6154	780	0	0
	T484	433	0	0	520	388	74.6154	780	0	0
Group III	S570	2414	0	0	1477	500	33.8524	5140	0	0
	S578	2414	0	0	1477	0	0	5140	4991	97.1
