# Supplementary material for: Yeast Nuak1 phosphorylates histone H3 threonine 11 in low glucose stress by the cooperation of AMPK and CK2 signaling
Source: eLife journal article supplement (doi:10.7554/elife.64588), 2020-12-29
Supplement: supp [file elife-64588-supp-v1.zip › elife_poa_e64588_Supplementary_file_2.xlsx]

## Sheet: Yeast strains
Supplementary file 2. Yeast strains used in this study
Name	Genotype	Source
BY4741	MATa his3Δ1 leu2Δ0 met15Δ0 ura3Δ0	Open Biosystems
ySE18	MATa his3Δ1 leu2Δ0 met15Δ0 ura3Δ0 cka1Δ::KanMX4	Open Biosystems
y1171	MATa his3Δ1 leu2Δ0 met15Δ0 ura3Δ0 tda1Δ::KanMX4	Open Biosystems
y1084	MATa his3Δ1 leu2Δ0 met15Δ0 ura3Δ0 rim15Δ::KanMX4	Open Biosystems
y1085	MATa his3Δ1 leu2Δ0 met15Δ0 ura3Δ0 snf1Δ::KanMX4	Open Biosystems
y1129	MATa his3Δ1 leu2Δ0 met15Δ0 ura3Δ0 gal83Δ::KanMX4	Open Biosystems
y1130	MATa his3Δ1 leu2Δ0 met15Δ0 ura3Δ0 sip1Δ::KanMX4	Open Biosystems
y1131	MATa his3Δ1 leu2Δ0 met15Δ0 ura3Δ0 sip2Δ::KanMX4	Open Biosystems
y1132	MATa his3Δ1 leu2Δ0 met15Δ0 ura3Δ0 snf4Δ::KanMX4	Open Biosystems
adr1Δ	MATa his3Δ1 leu2Δ0 met15Δ0 ura3Δ0 adr1Δ::KanMX4	Open Biosystems
cat8Δ	MATa his3Δ1 leu2Δ0 met15Δ0 ura3Δ0 cat8Δ::KanMX4	Open Biosystems
sip4Δ	MATa his3Δ1 leu2Δ0 met15Δ0 ura3Δ0 sip41Δ::KanMX4	Open Biosystems
mig1Δ	MATa his3Δ1 leu2Δ0 met15Δ0 ura3Δ0 mig1Δ::KanMX4	Open Biosystems
y1163	MATa his3Δ1 leu2Δ0 met15Δ0 ura3Δ0 snf1Δ::KanMX4 cka1Δ::NatMX6	In this study
y1166	MATa his3Δ200 leu2Δ0 lys2Δ0 trp1Δ63 ura3Δ0 met15Δ0 can1::MFA1pr-HIS3 hht1-hhf1::NatMX4 hht2-hhf2::[HHTS-HHFS]*-URA3	Open Biosystems
y1167	MATa his3Δ200 leu2Δ0 lys2Δ0 trp1Δ63 ura3Δ0 met15Δ0 can1::MFA1pr-HIS3 hht1-hhf1::NatMX4 hht2-hhf2::[HHTS T11A-HHFS]*-URA3	Open Biosystems
y1169	MATa his3Δ200 leu2Δ0 lys2Δ0 trp1Δ63 ura3Δ0 met15Δ0 can1::MFA1pr-HIS3 hht1-hhf1::NatMX4 hht2-hhf2::[HHTS S10A-HHFS]*-URA3	Open Biosystems
y2242	MATa his3Δ1 leu2Δ0 met15Δ0 ura3Δ0 cka1-TAP::HIS3	Open Biosystems
ctk1Δ	MATa his3Δ1 leu2Δ0 met15Δ0 ura3Δ0 ctk1Δ::KanMX4	Open Biosystems
dbf2Δ	MATa his3Δ1 leu2Δ0 met15Δ0 ura3Δ0 dbf2Δ::KanMX4	Open Biosystems
elm1Δ	MATa his3Δ1 leu2Δ0 met15Δ0 ura3Δ0 elm1Δ::KanMX4	Open Biosystems
fus3Δ	MATa his3Δ1 leu2Δ0 met15Δ0 ura3Δ0 fus3Δ::KanMX4	Open Biosystems
gcn2Δ	MATa his3Δ1 leu2Δ0 met15Δ0 ura3Δ0 gcn2Δ::KanMX4	Open Biosystems
hrk1Δ	MATa his3Δ1 leu2Δ0 met15Δ0 ura3Δ0 hrk1Δ::KanMX4	Open Biosystems
npr1Δ	MATa his3Δ1 leu2Δ0 met15Δ0 ura3Δ0 npr11Δ::KanMX4	Open Biosystems
psk1Δ	MATa his3Δ1 leu2Δ0 met15Δ0 ura3Δ0 psk1Δ::KanMX4	Open Biosystems
rck1Δ	MATa his3Δ1 leu2Δ0 met15Δ0 ura3Δ0 rck1Δ::KanMX4	Open Biosystems
rtk1Δ	MATa his3Δ1 leu2Δ0 met15Δ0 ura3Δ0 rtk11Δ::KanMX4	Open Biosystems
sak1Δ	MATa his3Δ1 leu2Δ0 met15Δ0 ura3Δ0 sak1Δ::KanMX4	Open Biosystems
ssn3Δ	MATa his3Δ1 leu2Δ0 met15Δ0 ura3Δ0 ssn3Δ::KanMX4	Open Biosystems
tos3Δ	MATa his3Δ1 leu2Δ0 met15Δ0 ura3Δ0 tos3Δ::KanMX4	Open Biosystems
ypk2Δ	MATa his3Δ1 leu2Δ0 met15Δ0 ura3Δ0 ypk2Δ::KanMX4	Open Biosystems
y2203	MATa his3Δ1 leu2Δ0 met15Δ0 ura3Δ0 reg1Δ::KanMX4 Snf1-3xflag::HIS3	In this study
y2211	MATa his3Δ1 leu2Δ0 met15Δ0 ura3Δ0 Tda1-TAP::HIS3	Open Biosystems
y2230	MATa his3Δ1 leu2Δ0 met15Δ0 ura3Δ0 Tda1-3xflag::HIS3	Open Biosystems
y2237	MATa his3Δ1 leu2Δ0 met15Δ0 ura3Δ0 snf1Δ::KanMX4 Tda1-3xflag::HIS3	In this study
y2239	MATa his3Δ1 leu2Δ0 met15Δ0 ura3Δ0 cka1Δ::KanMX4 Tda1-3xflag::HIS3	In this study
y2214	MATa his3Δ1 leu2Δ0 met15Δ0 ura3Δ0 Tda1-3xHA::KanMX6 Cka1-3xflag::HIS3	In this study
y2215	MATa his3Δ1 leu2Δ0 met15Δ0 ura3Δ0 Tda1-3xHA::KanMX6 Snf1-3xflag::HIS3	In this study
y2220	MATa his3Δ1 leu2Δ0 met15Δ0 ura3Δ0 Tda1-3xHA::KanMX6	In this study
w303-1A	MATa leu2-3,112 trp1-1 can1-100 ura3-1 ade2-1 his3-11,15
yw001	MATa leu2-3,112 trp1-1 can1-100 ura3-1 ade2-1 his3-11,15 tda1Δ::HIS3	In this study
yw003	MATa leu2-3,112 trp1-1 can1-100 ura3-1::[ADH1pr-Tda1-3xflag URA3] ade2-1 his3-11,15 tda1Δ::HIS3	In this study
yw005	MATa leu2-3,112 trp1-1 can1-100 ura3-1::[ADH1pr-Tda1 S483A/T484A-3xflag URA3] ade2-1 his3-11,15 tda1Δ::HIS3	In this study
yw011	MATa leu2-3,112 trp1-1 can1-100 ura3-1 ade2-1 his3-11,15 tda1Δ::HIS3 snf1Δ::KanMX6	In this study
yw013	MATa leu2-3,112 trp1-1 can1-100 ura3-1 ade2-1 his3-11,15 tda1Δ::HIS3 cka1Δ::KanMX6	In this study
yw022	MATa leu2-3,112 trp1-1 can1-100 ura3-1::[ADH1pr-Tda1-3xflag URA3] ade2-1 his3-11,15 tda1Δ::HIS3 cka1Δ::KanMX6	In this study
yw018	MATa leu2-3,112 trp1-1 can1-100 ura3-1::[ADH1pr-Tda1-3xflag URA3] ade2-1 his3-11,15 tda1Δ::HIS3 snf1Δ::KanMX6	In this study
yw014	MATa leu2-3,112 trp1-1 can1-100 ura3-1::[ADH1pr-Tda1-3xflag-cMycNLS URA3] ade2-1 his3-11,15 tda1Δ::HIS3	In this study
yw020	MATa leu2-3,112 trp1-1 can1-100 ura3-1::[ADH1pr-Tda1-3xflag-cMycNLS URA3] ade2-1 his3-11,15 tda1Δ::HIS3 snf1Δ::KanMX4	In this study
yw016	MATa leu2-3,112 trp1-1 can1-100 ura3-1::[ADH1pr-Tda1-3xflag-cMycNLS URA3] ade2-1 his3-11,15 tda1Δ::HIS3 cka1Δ::KanMX6	In this study
