# Supplementary figures and images for: Yeast Nuak1 phosphorylates histone H3 threonine 11 in low glucose stress by the cooperation of AMPK and CK2 signaling
Source: eLife journal article supplement (doi:10.7554/elife.64588), 2020-12-29

Figure 1-figure supplement 1

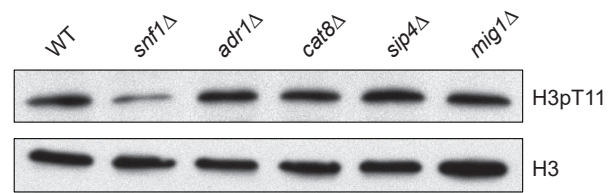

Supplement: supp [file elife-64588-supp-v1.zip › elife_poa_e64588_Figure_1_figure_supplement_1.pdf]

Figure 3-figure supplement 1

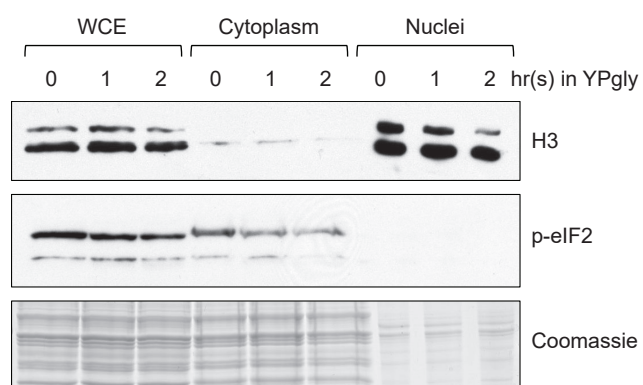

Supplement: supp [file elife-64588-supp-v1.zip › elife_poa_e64588_Figure_3_figure_supplement_1.pdf]

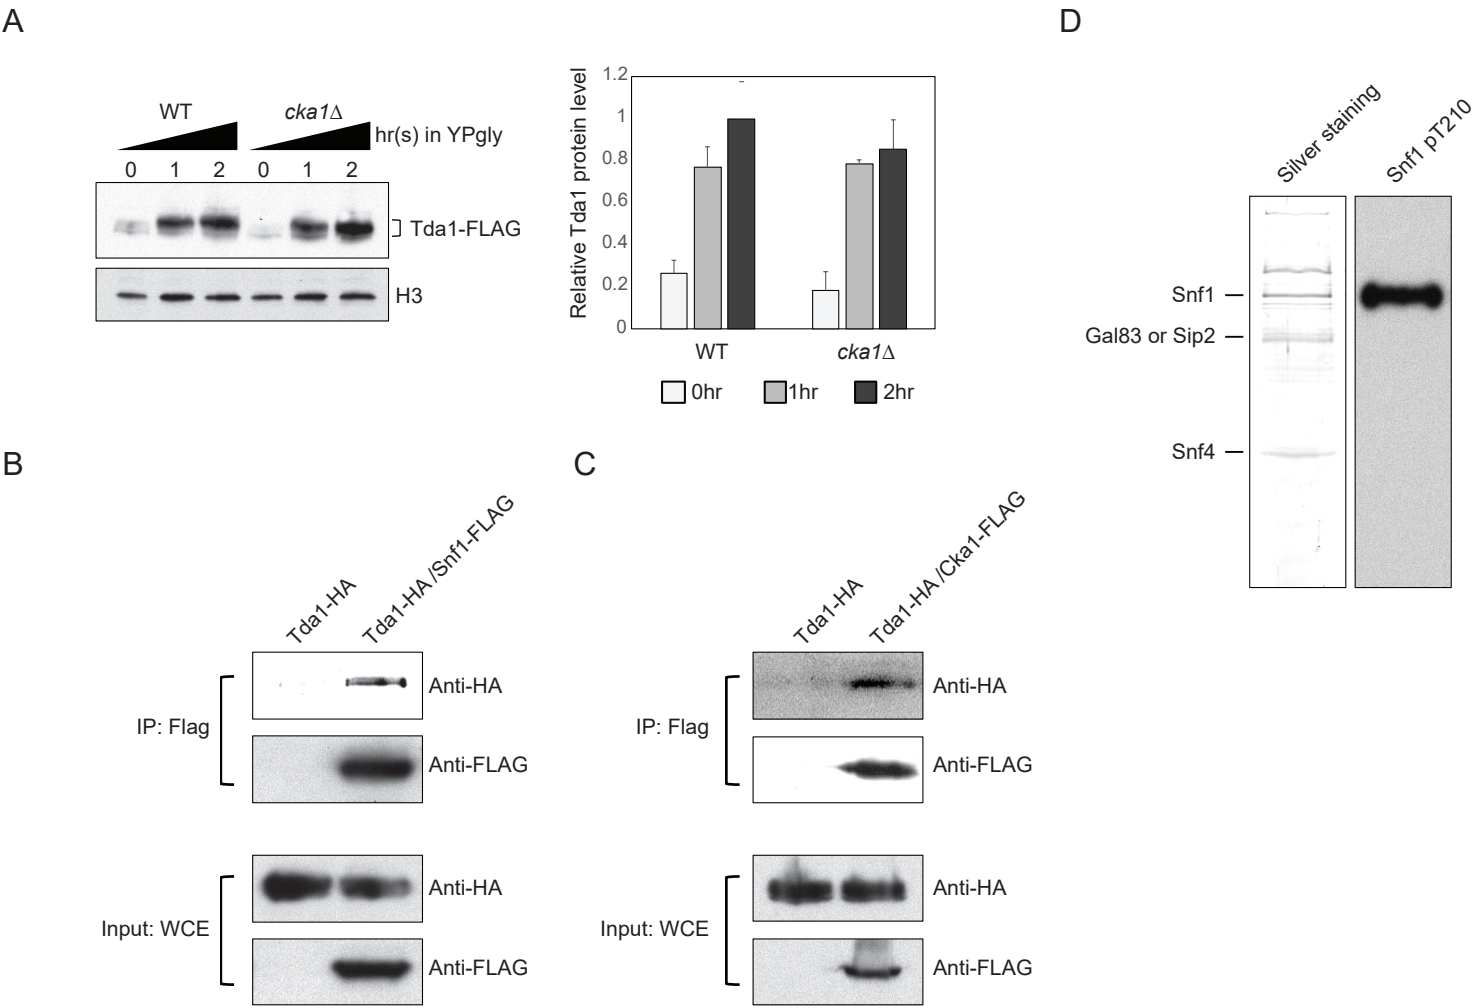

Supplement: supp [file elife-64588-supp-v1.zip › elife_poa_e64588_Figure_5_figure_supplement_1.pdf]

A

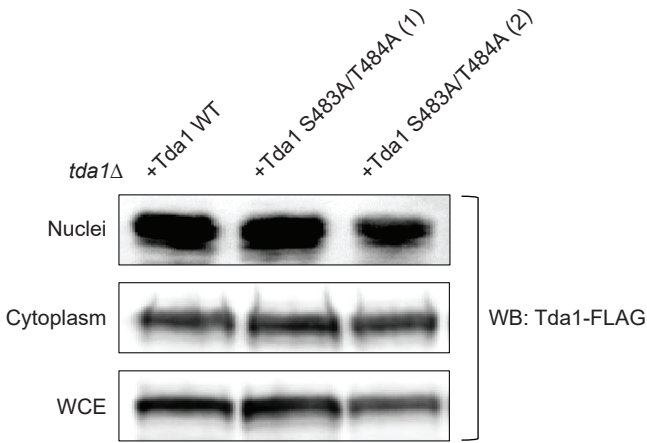

B

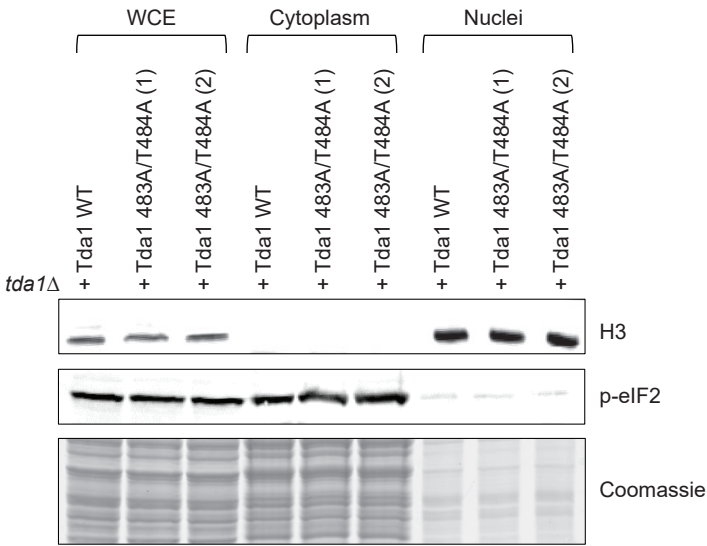

Supplement: supp [file elife-64588-supp-v1.zip › elife_poa_e64588_Figure_6_figure_supplement_1.pdf]

A

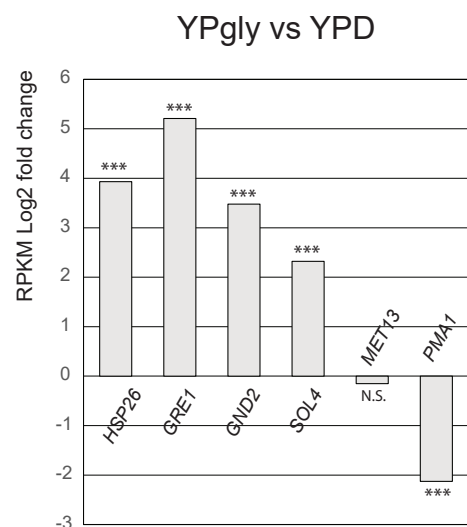

B

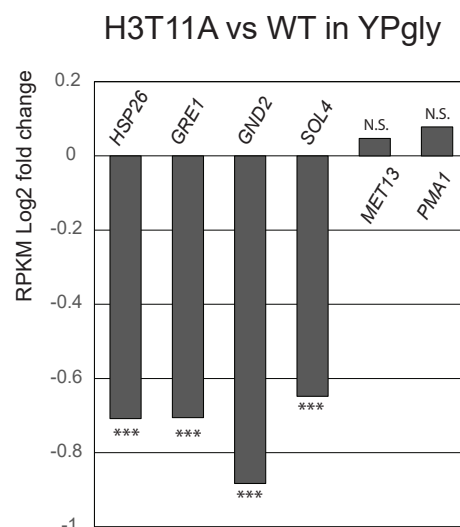

C

## H3pT11 target genes

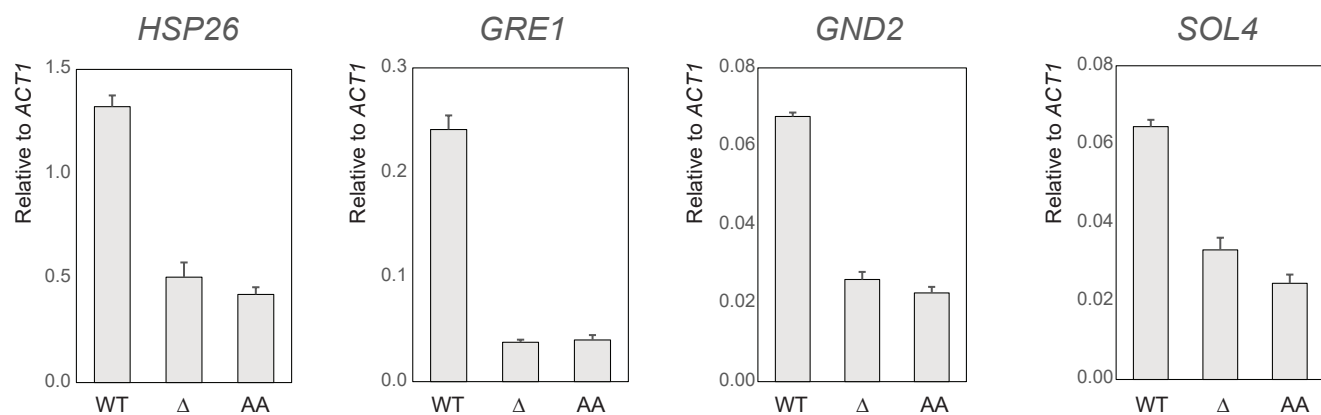

D

## Non-target genes

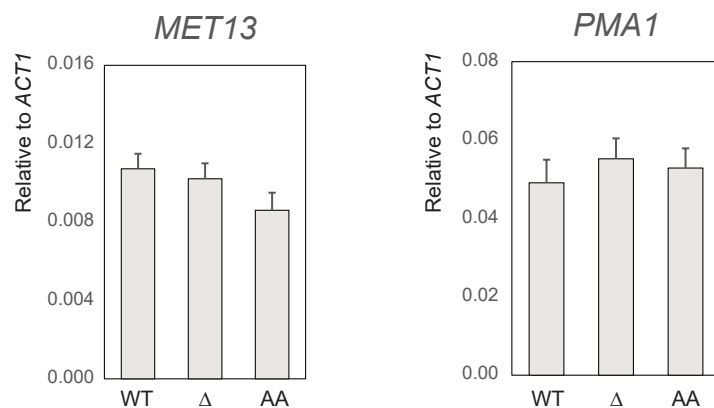

Supplement: supp [file elife-64588-supp-v1.zip › elife_poa_e64588_Figure_6_figure_supplement_2.pdf]

Figure 7-figure supplement 1

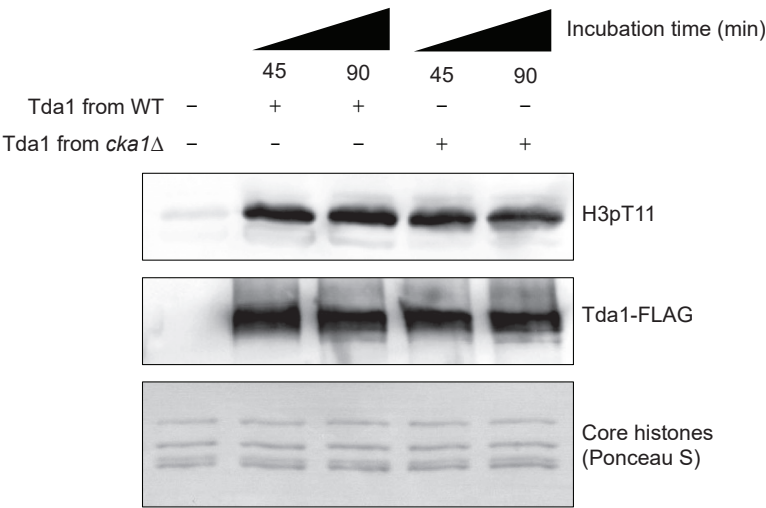

Supplement: supp [file elife-64588-supp-v1.zip › elife_poa_e64588_Figure_7_figure_supplement_1.pdf]
